# Supplementary material for: Multiphoton Microscopy for Identifying Collagen Signatures Associated with Biochemical Recurrence in Prostate Cancer Patients
Source: MDPI journal article supplement (doi:10.3390/jpm11111061), 2021-10-22
Supplement: s1 [file s1]

## Supplementary Materials

**Table S1.** Baseline clinical characteristics of patients treated with radical prostatectomy and with MPM-identified collagen features from prostatectomy specimen.

| Variable                           | Overall<br>(n= 59) |
|------------------------------------|--------------------|
| Age at surgery (yr)                | 62 (58.5,67.0)     |
| Race, n (%)                        |                    |
| Other                              | 48 (0.81)          |
| African American                   | 11 (0.19)          |
| PSA (ng/ml)                        | 5.4 (4.2, 8.5)     |
| Final Pathology Stage, n (%)       |                    |
| pT2                                | 38 (0.64)          |
| pT3a                               | 13 (0.22)          |
| pT3b                               | 8 (0.14)           |
| Final Pathology Grade Group, n (%) |                    |
| GG 1                               | 5 (0.08)           |
| GG 2                               | 30 (0.51)          |
| GG 3                               | 18 (0.31)          |
| GG 4/5                             | 6 (0.10)           |
| Extraprostatic extension, n (%)    |                    |
| Absent                             | 42 (0.71)          |
| Present                            | 17 (0.29)          |
| Seminal vesicular invasion, n (%)  |                    |
| Absent                             | 53 (0.90)          |
| Present                            | 6 (0.10)           |
| Lymphovascular invasion, n (%)     |                    |
| Absent                             | 55 (0.93)          |
| Present                            | 4 (0.07)           |
| Positive surgical margin, n (%)    |                    |
| Absent                             | 54 (0.92)          |
| Present                            | 5 (0.08)           |

**Table S2.** Label-free MPM profiling and quantification of prostate stromal composition

| MPM Image Channel                  | Contrast Source                | Quantifiers                                                                                                                                                         | Software               |
|------------------------------------|--------------------------------|---------------------------------------------------------------------------------------------------------------------------------------------------------------------|------------------------|
| SHG<br>Red channel                 | Fibrillar collagen             | <b>AF</b><br>Fraction of tissue occupied by SHG-emitting collagen<br>Measures the amount of collagen in an ROI                                                      | Fiji                   |
|                                    |                                | <b>I<sub>R</sub></b><br>Mean SHG signal intensity<br>Measures the brightness of collagen fibers in a ROI                                                            | Fiji                   |
|                                    |                                | <b>Fiber width, length, angle</b><br>Mean width and length of SHG-emitting fibers<br>Measures individual fiber morphology in a ROI                                  | CT-FIRE<br>Curve Align |
|                                    |                                | <b>Fiber orientation</b><br>Bulk coherence of SHG-emitting fibers<br>Measures the degree of collagen alignment in a ROI                                             | Curve Align            |
| 2PAF<br>Green channel              | Smooth muscle<br>Stromal cells | <b>I<sub>G</sub></b><br>Mean 2PAF signal intensity<br>Measures the brightness of tissue autofluorescence                                                            | Fiji                   |
| SHG/2PAF<br>Red and green channels | Collagen and stromal cells     | <b>I<sub>R</sub>/(I<sub>R</sub>+I<sub>G</sub>)</b><br>Normalized SHG signal intensity<br>Measures brightness of collagen fibers relative to tissue autofluorescence | Fiji                   |

**Table S3.** Summary of image analysis steps for each region of interest.

| Step 1: Image Possessing                                    |                                                               | Software   |
|-------------------------------------------------------------|---------------------------------------------------------------|------------|
| 1a                                                          | Background subtraction                                        | Fiji       |
| 1b                                                          | MPM image registration on reference H&E                       | MATLAB     |
| 1c                                                          | Tumor area annotation and region of interest selection        | QuPath     |
| Step 2: Image Segmentation                                  |                                                               |            |
| 2a                                                          | Stromal to tumor glands boundary creation                     | CurveAlign |
| 2b                                                          | Stromal region segmentation                                   | CurveAlign |
| Step 3: Collagen Area Fraction and Intensity Quantification |                                                               |            |
| 3a                                                          | Thresholding of SHG and 2PAF channel                          | Fiji       |
| 3b                                                          | Pixel area and mean pixels intensity calculations per channel | Fiji       |
| Step 4: Collagen Fiber Features Quantification              |                                                               |            |
| 4a                                                          | Segmentation and extraction of individual fibers              | CT-FIRE    |
| 4b                                                          | Individual fiber width and length calculation                 | CT-FIRE    |
| 4c                                                          | Mean value calculation for each quantifier                    | CT-FIRE    |
| Step 5: Collagen Orientation Calculations                   |                                                               |            |
| 5a                                                          | Stromal to tumor glands boundary creation                     | CurveAlign |
| 5b                                                          | Fiber Angle orientation relative to the boundary calculation  | CurveAlign |
| 5c                                                          | Mean value calculations                                       | CurveAlign |

**Table S4.** Univariable Cox Proportional Hazards models to evaluate association of time to biochemical recurrence and clinicopathological variables in the prostatectomy cohort. All variables, except age and PSA were factored. Age and PSA were evaluated as continuous variables. HR- Hazard Ratio, CI-Confidence Interval.

| Variable                    | Univariable analysis |        |        |             |
|-----------------------------|----------------------|--------|--------|-------------|
|                             | HR                   | 95% CI |        | p value > z |
| Age (per year)              | 1.01                 | 0.93   | 1.10   | 0.797       |
| PSA (ng/ml)                 | 1.02                 | 0.97   | 1.08   | 0.405       |
| Final Pathology Grade Group |                      |        |        |             |
| 1-2                         | ref                  |        |        |             |
| 3                           | 15.66                | 1.98   | 123.77 | 0.009       |
| 4-5                         | 5.94                 | 0.37   | 94.98  | 0.208       |
| Final Pathology Stage       |                      |        |        |             |
| pT2                         | ref                  |        |        |             |
| pT3a                        | 1.23                 | 0.23   | 6.73   | 0.811       |
| pT3b                        | 7.85                 | 2.09   | 29.39  | 0.002       |
| Extraprostatic Extension    |                      |        |        |             |
| Absent                      | ref                  |        |        |             |
| Present                     | 2.66                 | 0.81   | 8.72   | 0.107       |
| Seminal Vesicular Invasion  | ref                  |        |        |             |
| Absent                      |                      |        |        |             |
| Present                     | 6.07                 | 1.77   | 20.79  | 0.004       |
| Positive Surgical Margin    |                      |        |        |             |
| Absent                      | ref                  |        |        |             |
| Present                     | 2.22                 | 0.48   | 10.30  | 0.308       |

**Table S5.** A multivariable Cox Proportional Hazards model to evaluate association of time to biochemical recurrence and selected collagen variables in the prostatectomy cohort. Only variables with  $p < 0.05$  on univariable analysis were included. Interdependent collagen variables, such as collagen area fraction, intensities and fiber width were not included in the same model. HR- Hazard Ratio, CI-Confidence Interval, RP-Radical Prostatectomy.

| Variable                           | Multivariable analysis |        |          |             |
|------------------------------------|------------------------|--------|----------|-------------|
|                                    | HR                     | 95% CI |          | p value > z |
| Collagen Fiber Intensity ( $I_R$ ) | 1.06                   | 1.02   | 1.09     | 0.004       |
| Collagen Fiber Angle               | 2.75                   | 1.34   | 5.64     | 0.006       |
| RP Grade Group                     |                        |        |          |             |
| 1-2                                | ref                    |        |          |             |
| 3                                  | 1.17                   | 1.03   | 99.67    | 0.047       |
| 4-5                                | 2.64                   | 0.00   | 16.62    | 0.370       |
| RP Stage                           | 0.89                   | 0.08   | 2.52     | 0.357       |
| Seminal Vesicular Invasion         | 2.24                   | 1.57   | 10284.54 | 0.031       |

**Table S6.** Univariable Cox Proportional Hazards models to evaluate association of time to biochemical recurrence and collagen variables in patients at intermediate risk (RP Grade Group of 2 and 3) from the prostatectomy cohort.

| Variable                                | Univariable analysis |        |      |             |
|-----------------------------------------|----------------------|--------|------|-------------|
|                                         | HR                   | 95% CI |      | p value > z |
| Collagen Area Fraction (AF)             | 1.05                 | 1.01   | 1.09 | 0.019       |
| Collagen Fiber Intensity ( $I_R$ )      | 1.02                 | 1.01   | 1.04 | 0.009       |
| Normalized Intensity ( $I_R/I_R+I_G$ )  | 1.13                 | 1.04   | 1.22 | 0.004       |
| Collagen Fiber Length ( $\mu\text{m}$ ) | 1.10                 | 0.97   | 1.25 | 0.154       |
| Collagen Fiber Width ( $\mu\text{m}$ )  | 3.02                 | 1.03   | 8.87 | 0.044       |
| Collagen Fiber Angle (degrees)          | 1.25                 | 0.87   | 1.77 | 0.224       |
| Collagen Fiber Coherence                | 0.95                 | 0.89   | 1.01 | 0.122       |

**Table S7.** Univariable Cox Proportional Hazards models to evaluate association of time to biochemical recurrence and selected clinical variables in the biopsy cohort. All variables, except age and PSA were factored.

| Variable           | Univariable analysis |        |        |             |
|--------------------|----------------------|--------|--------|-------------|
|                    | HR                   | 95% CI |        | p value > z |
| Age (per year)     | 1.02                 | 0.93   | 1.12   | 0.678       |
| PSA (ng/ml)        | 1.12                 | 1.04   | 1.20   | 0.002       |
| Biopsy Grade Group |                      |        |        |             |
| 1-2                | ref                  |        |        |             |
| 3                  | 12.10                | 1.31   | 112.05 | 0.028       |
| 4-5                | 11.11                | 1.21   | 102.44 | 0.034       |
| Clinical Stage     |                      |        |        |             |
| cT1                | ref                  |        |        |             |
| cT2                | 1.59                 | 0.42   | 5.94   | 0.493       |

**Table S8.** Multivariable Cox Proportional Hazards model to evaluate association of time to biochemical recurrence and collagen variables in the biopsy cohort. Only variables with  $p < 0.05$  on univariable analysis were included. Interdependent collagen variables, such as collagen area fraction, intensities and fiber width were not included in the same model.

| Variable                           | Multivariable analysis |        |        |             |
|------------------------------------|------------------------|--------|--------|-------------|
|                                    | HR                     | 95% CI |        | p value > z |
| Collagen Fiber Intensity ( $I_R$ ) | 1.10                   | 1.01   | 1.19   | 0.020       |
| PSA (ng/ml)                        | 1.11                   | 1.01   | 1.22   | 0.036       |
| Biopsy Grade Group                 |                        |        |        |             |
| 1-2                                | ref                    |        |        |             |
| 3                                  | 7.62                   | 0.46   | 126.88 | 0.157       |
| 4-5                                | 4.70                   | 0.28   | 78.40  | 0.281       |
